# Supplementary material for: Extracellular Matrix Deposition in Engineered Micromass Cartilage Pellet Cultures: Measurements and Modelling
Source: PubMed Central journal article supplement (PMC4758662; doi:10.1371/journal.pone.0147302), 2016-02-18
Supplement: pone.0147302.s001.pdf [file pone.0147302.s001.pdf]

# Extracellular Matrix Deposition in Engineered Micromass Cartilage Pellet Cultures: Measurements and Modelling

Miranda C. Lewis<sup>1</sup>, Ben D. MacArthur<sup>1,2</sup>, Rahul S. Tare<sup>2</sup>, Richard O.C. Oreffo<sup>2</sup>, Colin P. Please<sup>3</sup>

<sup>1</sup> Mathematical Sciences, University of Southampton, Southampton, SO17 1BJ, UK

<sup>2</sup> Centre for Human Development, Stem Cells and Regeneration, Faculty of Medicine, University of Southampton, Southampton, SO16 6YD, UK

<sup>3</sup> Mathematical Institute, University of Oxford, Oxford, OX2 6GG, UK

## Supporting Information

The mathematical model is given by

$$n + p = 1 \quad (4)$$

$$\frac{\partial B}{\partial t} + \nabla \cdot (\underline{u} B) = D \nabla^2 B - \frac{\alpha B}{\kappa_0 + B} H(B) n, \quad (5)$$

$$\frac{\partial n}{\partial t} + \nabla \cdot (\underline{u} n) = 0, \quad (6)$$

$$\frac{\partial p}{\partial t} + \nabla \cdot (\underline{u} p) = \frac{\beta B}{\kappa_0 + B} H(B) n \quad (7)$$

with  $B = B_0$  and  $v = \frac{dS}{dt}$  at  $r = S$ ,  $v = 0$  and  $\frac{\partial B}{\partial r} = 0$  at  $r = 0$ , and  $S = S_0$ ,  $n = 1$  and  $p = 0$  at  $t = 0$ .

To nondimensionalise the model, the nutrient concentration is rescaled with that in the culture medium; time with the matrix production rate constant,  $\beta$ ; and distance with the nutrient diffusion length scale. The following change of variables is subsequently introduced:

$$B = B_0 \tilde{B}, \quad t = T \tilde{t}, \quad r = L \tilde{r}, \quad S = L \tilde{S} \quad \text{and} \quad v = \frac{L}{T} \tilde{v}$$

where

$$L = \sqrt{\frac{D B_0}{\alpha}} \quad \text{and} \quad T = \frac{1}{\beta}$$

This system can then be simplified by adding together equations (6) and (7), to give the nondimensional model presented in the main text.
